1 Carriage of antibiotic resistant bacteria in endangered and declining Australian  
2 pinniped pups

3

4 Mariel Fulham<sup>1</sup>, Fiona McDougall<sup>2</sup>, Michelle Power<sup>2</sup>, Rebecca R. McIntosh<sup>3</sup> and Rachael  
5 Gray<sup>1\*</sup>

6

7 <sup>1</sup>Sydney School of Veterinary Science, Faculty of Science, The University of Sydney, NSW,  
8 2006, Australia

9 <sup>2</sup>Department of Biological Sciences, Macquarie University, North Ryde, NSW 2109,  
10 Australia

11 <sup>3</sup>Research Department, Phillip Island Nature Parks, Cowes, Victoria, 3922, Australia

12

13 \*Corresponding Author

14 Email: [rachael.gray@sydney.edu.au](mailto:rachael.gray@sydney.edu.au) (RG)

15

16

17

18

19

20

21

22

23

24

25

## 26 **Abstract**

27 The rapid emergence of antimicrobial resistance (AMR) is a major concern for wildlife and  
28 ecosystem health globally. Genetic determinants of AMR have become indicators of  
29 anthropogenic pollution due to their greater association with humans and rarer presence in  
30 environments less affected by humans. The objective of this study was to determine the  
31 distribution and frequency of the class 1 integron, a genetic determinant of AMR, in both the  
32 faecal microbiome and in *Escherichia coli* isolated from neonates of three pinniped species.  
33 Australian sea lion (*Neophoca cinerea*), Australian fur seal (*Arctocephalus pusillus doriferus*)  
34 and long-nosed fur seal (*Arctocephalus forsteri*) pups from eight breeding colonies along the  
35 Southern Australian coast were sampled between 2016-2019. DNA from faecal samples  
36 ( $n=309$ ) and from *E. coli* ( $n=795$ ) isolated from 884 faecal samples were analysed for class 1  
37 integrons using PCRs targeting the conserved integrase gene (*intI*) and the gene cassette  
38 array. Class 1 integrons were detected in *A. p. doriferus* and *N. cinerea* pups sampled at  
39 seven of the eight breeding colonies investigated in 4.85% of faecal samples ( $n=15$ ) and  
40 4.52% of *E. coli* isolates ( $n=36$ ). Integrons were not detected in any *A. forsteri* samples. DNA  
41 sequencing of the class 1 integron gene cassette array identified diverse genes conferring  
42 resistance to four antibiotic classes. The relationship between class 1 integron carriage and  
43 the concentration of five trace elements and heavy metals was also investigated, finding no  
44 significant association. The results of this study add to the growing evidence of the extent to  
45 which antimicrobial resistant bacteria are polluting the marine environment. As AMR  
46 determinants are frequently associated with bacterial pathogens, their occurrence suggests  
47 that these pinniped species are vulnerable to potential health risks. The implications for  
48 individual and population health as a consequence of AMR carriage is a critical component  
49 of ongoing health investigations.

50

## 51 **Introduction**

52 Aquatic ecosystems are being increasingly identified as a sink for antimicrobial resistance  
53 (AMR) (1,2). Aquatic systems provide a transport medium for the global dissemination of  
54 antibiotic resistant bacteria (ARB) and associated antibiotic resistance genes (ARGs) (1–3).  
55 The combination of ARB with antibiotic residues and other pollutants in aquatic  
56 environments also promote the proliferation and establishment of resistant bacterial  
57 communities (2,4).

58 The widespread dissemination of AMR can partly be attributed to horizontal gene transfer  
59 (HGT) which allows the transfer of ARGs and associated genetic machinery between diverse  
60 bacterial species, facilitating the acquisition of novel traits from the environment and other  
61 bacteria (5,6). In Gram-negative bacteria in particular, the rapid evolution of resistance has  
62 been linked to HGT and mobile genetic elements (7). Class 1 integrons, for example, are  
63 mainly found in Gram-negative bacteria (8) and are able to capture and subsequently express  
64 a multitude of ARGs (9,10), which can be transferred between bacteria via their association  
65 with transposons and plasmids. In the human context, the clinical class 1 integron is  
66 considered to be of high importance for AMR dissemination (11). The class 1 integron  
67 contains a conserved 5' segment which encodes the integrase gene (*intI1*) and a varying  
68 number of gene cassettes that together form a gene cassette array (12). The conserved *intI1* is  
69 a useful genetic indicator of antimicrobial pollution as it is universally present, occurs in high  
70 abundance in humans and domestic animals, is highly abundant in waste streams and is rarely  
71 present in environments less affected by humans (13). The recombination of gene cassettes is  
72 mediated by *intI1*, allowing the class 1 integron to capture, remove and express a variety of  
73 gene cassettes (12). Variations of the class 1 integron are now emerging, with insertion  
74 sequences in the 3' segment, such as IS26, assisting in the dissemination of resistance genes  
75 in Gram-negative bacteria. These insertion sequences are associated with numerous genes

76 that confer resistance to multiple antibiotic classes, and are able to promote and subsequently  
77 express these associated resistance genes (14,15).

78 Agricultural runoff, in addition to mining, municipal wastewater, and industrial and  
79 pharmaceutical waste are point sources of heavy metal pollutants frequently found in natural  
80 environments (16). Heavy metals are considered to be co-selective agents of AMR (16).  
81 Aquatic environments polluted by heavy metals have been associated with a greater  
82 incidence of class 1 integrons compared to non-polluted sites (17,18), through mechanisms of  
83 cross- and co-resistance (19). The presence of heavy metals and antibiotic residues also  
84 common in the environment have the potential to exert a selective pressure that promotes the  
85 emergence and persistence of AMR in the environment (20–22). As heavy metals can  
86 bioaccumulate and persist in the environment, such selective pressures are applied for  
87 extended periods of time, facilitating the development resistance traits in microbial  
88 communities (23). However, there has been little investigation into whether there is increased  
89 acquisition of antibiotic resistant bacteria in humans and non-human animals in environments  
90 that have greater exposure to heavy metals.

91 Concentrations of essential trace elements and heavy metals including zinc (Zn), arsenic  
92 (As), selenium (Se), mercury (Hg) and lead (Pb) are of particular interest for wildlife health.  
93 The presence of Pb, even at low concentrations, can be associated with disease (24). In  
94 contrast, Zn and Se are essential trace elements, but these too can have toxic effects at high  
95 concentrations (25). Heavy metals have previously been identified in free-ranging pinnipeds  
96 (26–28), however, there has been no consideration of potential co-selection of ARGs in  
97 wildlife species associated with heavy metal exposure. Given the role that heavy metals play  
98 in the environmental amplification of ARB, investigating the levels of heavy metals and class  
99 1 integron frequency in wildlife species could provide valuable insights into the factors  
100 contributing to the abundance and acquisition of ARB in free-ranging wildlife.

101           A diverse range of antibiotic resistant bacterial species have been detected in marine  
102 mammals (29,30), which are large-bodied, long-lived upper trophic predators considered to  
103 have a role as sentinels of marine health (31). *Escherichia coli* is a Gram-negative bacterium  
104 that is commonly used as an indicator of anthropogenic pollution (20), and has been used for  
105 the investigation of class 1 integrons in many species (32–36). Evidence suggests that class 1  
106 integrons are more prevalent in *E. coli* isolates that are closely associated with anthropogenic  
107 pollution and human environments (7). The presence of class 1 integrons in *E. coli* has been  
108 investigated in some species of free-ranging pinnipeds in the Southern Hemisphere. An  
109 absence of class 1 integrons was reported in *E. coli* isolated from free-ranging southern  
110 elephant seals (*Mirounga leonina*), Weddell seals (*Leptonychotes weddellii*) (37) and adult  
111 Australian sea lions (*Neophoca cinerea*) (36), although class 1 integrons were detected in *E.*  
112 *coli* from captive adult *N. cinerea* (36). The presence of class 1 integrons in captive wildlife  
113 and comparative absence in free-ranging individuals suggest that environmental conditions  
114 and the intimate proximity to humans experienced in captivity can impact the acquisition of  
115 ARGs by wildlife species and is consistent for many wildlife species (33,34,36). Consistent  
116 with the hypothesis that the presence of ARGs in wildlife is associated with proximity to  
117 humans, a class 1 integron was recently detected in *E. coli* from a single free-ranging *N.*  
118 *cinerea* pup at a colony with comparatively high anthropogenic influence compared to a more  
119 remote colony (35).

120           The occurrence of class 1 integrons and ARG carriage in two additional pinniped  
121 species inhabiting Australian waters, namely Australian fur seals (*Arctocephalus pusillus*  
122 *doriferus*) and long-nosed fur seals (*Arctocephalus forsteri*), has not been investigated. All  
123 three species, *N. cinerea*, *A. p. doriferus*, and *A. forsteri*, inhabit numerous offshore islands  
124 along the Australian coast from Western Australia to Tasmania (38), with the ranges of these  
125 pinniped species overlapping in South Australia. Colonies of each species experience

126 differing levels of human interaction; those on islands remote to mainland Australia  
127 experience little to no contact with humans while others are popular, frequently visited tourist  
128 sites. The differing proximities of sympatric colonies to human habitation and exposure to  
129 anthropogenic impacts creates a naturally occurring gradient ideal for studying anthropogenic  
130 pollution in the marine environment.

131 The main objective of this study was to determine the prevalence of class 1 integrons  
132 and ARG carriage in both the faecal microbiota and *E. coli* isolates from pups of three  
133 pinniped species sampled at multiple breeding colonies throughout Southern Australia. Given  
134 the role heavy metals have as a co-selective agent for AMR, an additional aim was to  
135 determine whether there was a relationship between the concentration of essential elements  
136 and heavy metals (Zn, Se, As, Hg and Pb) and class 1 integron prevalence. It was  
137 hypothesised that class 1 integrons would be more abundant in pups at colonies in closer  
138 proximity to sources of anthropogenic pollution. This paper reports the presence of ARGs in  
139 *E. coli* isolates and faecal microbiota of *N. cinerea* and *A. p. doriferus* pups at multiple  
140 breeding colonies along the Australian coast. We explore the differences between species and  
141 colonies and discuss factors contributing to changes in class 1 integron prevalence across  
142 breeding seasons and colonies. We provide recommendations for future investigations to  
143 further understand the dissemination of AMR in free-ranging pinniped species.

## 144 **Methods**

### 145 **Study sites and sample collection**

146 Faecal swabs ( $n=884$ ) were collected from neonatal pups sampled at eight breeding colonies  
147 across multiple breeding seasons from 2016-2019 (Fig 1 and Table 1). Breeding seasons are  
148 annual for both *A. p. doriferus* and *A. forsteri* with pupping beginning in November, while *N.*  
149 *cinerea* breeding seasons occur every 18 months. *Arctocephalus pusillus doriferus* and *A.*

150 *forsteri* pups were approximately 3-6 weeks of age and *N. cinerea* pups were 2-6 weeks of  
151 age at time of sampling. Samples were collected following methods described by Fulham et  
152 al. (35,39). In brief, sterile swabs (Copan, Brescia, Italy) were inserted directly into the  
153 rectum of each pup and resulting samples were sub-sampled into sterile FecalSwab™ tubes  
154 (Copan, Brescia, Italy). FecalSwab samples were stored at 4°C and cultured within 7-10 days  
155 of collection. Blood samples were collected from the brachial vein of pups as per  
156 methodology in Fulham et al. (35) and refrigerated at 4°C prior to storage at -20°C. Due to  
157 time and logistical constraints, blood collection was limited to pups sampled at Seal Bay,  
158 Olive Island, Cape Gantheaume, Seal Rocks (2018 and 2019) and Deen Maar Island.  
159 Sampling for *N. cinerea* and *A. forsteri* were approved by the Animal Ethics Committee at  
160 the University of Sydney (Protocol Nos. 2014/726 and 2017/1260); sampling methods for *A.*  
161 *p. doriferus* were approved by Phillip Island Nature Parks Animal Ethics Committee  
162 (Protocol No. 2.2016).

163 **Fig 1. Map of the geographical locations of breeding colonies and pinniped species**

164 **sampled.** Breeding colonies in South Australia (A) include Olive Island, (B) Seal Bay, Seal  
165 Slide and Cape Gantheaume on Kangaroo Island, and (C) Cape Bridgewater, Deen Maar  
166 Island, Seal Rocks and The Skerries in Victoria. The closest capital city to breeding colonies  
167 in South Australia is Adelaide and capital city in Victoria is Melbourne.

168 **Table 1. Sample collection across breeding colonies and seasons.**

| Sampling site | Species | Year of breeding<br>season and sample<br>collection ( <i>n</i> faecal<br>samples collected) | Geographical<br>coordinates |
|---------------|---------|---------------------------------------------------------------------------------------------|-----------------------------|
|---------------|---------|---------------------------------------------------------------------------------------------|-----------------------------|

---

|                  |                        |           |                   |
|------------------|------------------------|-----------|-------------------|
| Seal Bay         | <i>N. cinerea</i>      | 2016 (48) | 35.95°S, 137.32°E |
|                  |                        | 2018 (59) |                   |
|                  |                        | 2019 (63) |                   |
| Seal Slide       | <i>N. cinerea</i>      | 2018 (4)  | 36.03°S, 137.29°E |
| Olive Island     | <i>N. cinerea</i>      | 2017 (89) | 32.43°S, 133.58°E |
|                  |                        | 2019 (66) |                   |
|                  | <i>A. forsteri</i>     | 2019 (12) |                   |
| Cape Gantheaume  | <i>A. forsteri</i>     | 2016 (69) | 36.24°S, 137.27°E |
|                  |                        | 2018 (80) |                   |
| Seal Rocks       | <i>A. p. doriferus</i> | 2017 (46) | 38.31°S, 145.5°E  |
|                  |                        | 2018 (99) |                   |
|                  |                        | 2019 (94) |                   |
| Deen Maar Island | <i>A. p. doriferus</i> | 2017 (95) | 38.24°S, 142.0°E  |
| Cape Bridgewater | <i>A. p. doriferus</i> | 2017 (37) | 38.18°S, 141.24°E |
| The Skerries     | <i>A. p. doriferus</i> | 2017 (23) | 37.45°S, 149.31°E |

169 Location of sampling sites, species at each colony and number of faecal samples collected  
170 during each breeding season.

## 171 ***E. coli* culture, isolation and DNA extraction**

172 FecalSwab™ samples were cultured following the methodology described by Fulham  
173 et al. (35,39). In summary, a selective media, Chromocult® coliform agar (Merck,  
174 Darmstadt, Germany), was used to isolate *E. coli*. After initial culture, *E. coli* colonies were  
175 sub-cultured and pure *E. coli* colonies were selected for DNA extraction based on colour and  
176 morphology. Pure *E. coli* colonies were inoculated into Luria-Bertani broth (5ml) and  
177 incubated at 37°C for 24 hours in preparation for preservation and DNA extraction. DNA was



178 extracted using a boil preparation method where the broth culture was centrifuged to pellet  
179 bacteria. Supernatant was decanted and bacterial pellet resuspended with sterile water  
180 (50µL). Samples were then heated for 5min at 95°C followed by centrifugation and resulting  
181 bacterial lysates were stored at -30°C.

## 182 **Faecal DNA extraction and PCR competency**

183 DNA was extracted from a subset of faecal samples ( $n=309$ ) as part of an exploratory  
184 analysis into the presence of *intI1* in pinniped microbiomes. Samples were randomly selected  
185 from each of the following colonies during each breeding season: Seal Bay 2016 ( $n=48$ ); Seal  
186 Rocks 2017 ( $n=46$ ), 2018 ( $n=30$ ), 2019 ( $n=30$ ); Deen Maar Island ( $n=30$ ); Cape Bridgewater  
187 ( $n=30$ ); the Skerries ( $n=23$ ); Cape Gantheaume 2018 ( $n=30$ ); Olive Island 2019 ( $n=30$  *N.*  
188 *cinerea*,  $n=12$  *A. forsteri*). Genomic DNA was extracted from FecalSwab™ sample media  
189 (200µL) using the ISOLATE Fecal DNA kit (Bioline, Sydney, Australia) as per  
190 manufacturer's instructions. PCR competency of DNA extracted from faecal samples and *E.*  
191 *coli* isolates was tested by a 16S PCR (Table 2) using methods described by Fulham et al.  
192 (35).

## 193 **Screening for class 1 integrons**

194 All faecal samples and *E. coli* isolates positive for 16S rDNA were further screened  
195 for the presence of the class 1 integron integrase gene (*intI1*) using HS463a and HS464  
196 primers (Table 2) following the methods described by Waldron and Gillings (40).

197 **Table 2. PCR primers and target region.**

| Primer | Sequence 5'-3'         | Target       | Reference |
|--------|------------------------|--------------|-----------|
| f27    | AGAGTTTGATCMTGGCTCAG   | 16S rRNA     | (41)      |
| r1492  | TACGGYTACCTTGTTACGACTT | 16S rRNA     | (41)      |
| HS463a | CTGGATTTCGATCACGGCACG  | <i>intI1</i> | (40)      |
| HS464  | ACATGCGTGTAATCATCGTCG  | <i>intI1</i> | (40)      |

|       |                          |              |      |
|-------|--------------------------|--------------|------|
| HS458 | GTTTGATGTTATGGAGCAGCAACG | <i>attII</i> | (42) |
| HS459 | GCAAAAAGGCAGCAATTATGAGCC | <i>qacE1</i> | (42) |
| JL-D2 | CGCATCACCTCAATACCTT      | IS26         | (14) |

198 Primers used for amplification of 16S rRNA, class 1 integron components and sequencing.

199 Samples containing *intII* were tested using additional PCRs to target the gene cassette  
200 array using HS458 and HS459 primers (Table 2) and PCR conditions described by (40). Any  
201 samples that did not produce a band for the HS458/HS459 PCR were analysed using a  
202 secondary primer set consisting of HS458 and JL-D2, which targets the IS26 transposase, an  
203 alternate 3' terminus in integrons (14), using the conditions as described for HS458/HS459.

204 All PCRs included a positive control sample (integron positive *E. coli* KC2) and  
205 negative control (PCR-grade H<sub>2</sub>O) and were resolved using gel electrophoresis (16S rRNA  
206 and HS463a/HS464 2% agarose w/v, HS458/459 and HS458/JL-D2 3% agarose w/v) with  
207 SYBR safe gel stain (Invitrogen, city, Australia). Electrophoresis was conducted at 100V for  
208 30 min (16S) or 40 min (463/464; 458/459/JL-D2) in TBE (Tris, boric acid,  
209 ethylenediaminetetraacetic acid) and product size approximated using HyperLadderII 50bp  
210 DNA marker (Bioline, Sydney, Australia).

## 211 **Cloning, sequencing and analysis**

212 Using the MinElute PCR Purification Kit (Qiagen, Melbourne, Australia), amplicons  
213 from the two gene cassette array PCRs (HS458/459 and HS458/JL-D2) were purified  
214 following manufacturer's instructions. Amplicons containing only a single band were  
215 sequenced directly using the purified PCR product.

216 Amplicons containing multiple bands, indicating the presence of more than one gene  
217 cassette, were cloned using the TOPO TA cloning kit and transformed into One Shot ®  
218 DH5™-T1<sup>R</sup> competent *E. coli* cells (Invitrogen, Carlsbad, CA, USA) as per manufacturer's  
219 protocol. Between six to twelve colonies of transformed *E. coli* were selected from each

220 cloned sample and DNA from cell lysates were screened using HS458, HS459 and JL-D2 as  
221 described above. Amplicons of variable sizes were selected for sequencing.  
222 Amplicons from HS463a/HS464 that did not amplify in HS458/HS459 or HS458/ JL-D2  
223 were purified and sequenced to confirm positive *intI* result.

224 Sequencing was performed at The Ramaciotti Centre for Genomics (University of  
225 New South Wales, Sydney, Australia) using Big Dye Terminator chemistry version 3.1 and  
226 ABI 3730/3730x1 Capillary Sequencers (Applied Biosystems, Foster City, CA, USA).  
227 Geneious Prime software (version 11.0.6; Biomatters Limited, Auckland, New Zealand) was  
228 employed to assemble and manually check sequences for quality. Assembled sequences were  
229 analysed for the presence of antibiotic resistance genes using Integrall  
230 (<http://integrall.bio.ua.pt>). Class 1 integron gene cassette arrays were confirmed via detection  
231 of the 3' conserved region containing *qacE*. For arrays containing more than one gene  
232 cassette, the *attC* recombination site located between cassettes was identified using the highly  
233 conserved core sequence GTTRRRY and complementary inverse core sequence RYYAAC  
234 (43). Representative sequences generated from this study have been submitted to GenBank  
235 and are awaiting accession.

## 236 **Essential element and heavy metal concentrations**

237 The concentrations of Zn, As, Se, Hg, and Pb in whole blood of *A. p. doriferus* pups sampled  
238 at Seal Rocks in 2018 ( $n=52$ ) were provided by another study (Cobb-Clarke and Gray,  
239 personal communication) following previously described methods (27). The data was derived  
240 from samples analysed using inductively coupled plasma-mass spectrometry (ICP-MS;  
241 Agilent Technologies 7500 ce inductively coupled plasma mass spectroscopy, Santa Clara,  
242 CA). The median values and 95% confidence intervals (obtained from back transformed log  
243 data) for essential element and heavy metals in blood ( $\mu\text{g/L}$ ) were Zn=3.73 (95% CI 3.67-

244 3.87), Se=3.05 (95% CI 3.00-3.56), As=0.06 (95% CI 0.05-0.07), Hg=0.04 (95% CI 0.05-  
245 0.12) and Pb=0.04 (95% CI 0.04-0.10).

## 246 **Statistical analyses**

247 All statistical analyses were conducted using RStudio software (V 1.2.5042, Boston,  
248 Massachusetts, USA). The Shapiro-Wilk's test was used to test for normality of data and any  
249 variables with significant ( $<0.05$ ) and non-normal distribution were log transformed which  
250 normalised the data set and allowed for parametric statistical analysis. Significance was  
251 determined when  $p < 0.05$ .

252 The statistical analysis of class 1 integron distribution was conducted using Fisher's  
253 exact test to test for differences in class 1 integron occurrence between species. Pearson's  
254 chi-squared test was used to test for differences in class 1 integron occurrence within species  
255 across sampling sites and breeding seasons.

256 Welch's two sample t-test was used to test for significance in the relationship between  
257 integrons and essential element and heavy metal concentrations in *A. p. doriferus* pups ( $n=52$ )  
258 sampled at Seal Rocks 2018. Of these 52 individuals, 14 were integron positive.

## 259 **Results**

### 260 **Detection of class 1 integrons**

261 *Escherichia coli* was isolated from a total of 795 faecal samples (89.9%) with PCR screening  
262 for *intI1* revealing 36 positive isolates (4.52%,  $n=795$ ) based on the presence of the expected  
263 473bp product. Seven of the positive *E. coli* isolates were from *N. cinerea* and 29 from *A. p.*  
264 *doriferus*. Screening of faecal DNA detected *intI1* in 15 faecal samples (4.85%,  $n=309$ ), with  
265 four from *N. cinerea* and 11 from *A. p. doriferus*. All faecal samples and *E. coli* isolates from  
266 *A. forsteri* were negative for *intI1* (Fig 2).

267 **Fig 2. Graph of class 1 integrons detected in pinniped pups.** Total number of class 1  
268 integrons detected in faecal and *E. coli* isolate DNA in *N. cinerea* and *A. p. doriferus* pups at  
269 each colony during each breeding season sampled, with percentage of pups that tested  
270 positive.

271 Class 1 integrons were detected at all *N. cinerea* and *A. p. doriferus* colonies sampled  
272 (Fig 2). There was a significant difference in the prevalence of class 1 integrons across *A. p.*  
273 *doriferus* colonies sampled ( $\chi^2_{3,40} = 58.8$ ,  $p < 0.001$ ). There was no statistically significant  
274 difference in prevalence across *N. cinerea* colonies ( $\chi^2_{2,11} = 2.90$ ,  $p = 0.234$ ). The highest  
275 number of class 1 integrons ( $n=27$ ) was observed in *A. p. doriferus* pups at Seal Rocks in  
276 2018. The analysis of prevalence within colonies across breeding seasons revealed a  
277 significant difference at Seal Rocks ( $\chi^2_{2,31} = 40.51$ ,  $p < 0.001$ ) and Seal Bay ( $\chi^2_{2,5} = 10$ ,  
278  $p < 0.01$ ), but there was no significant difference at Olive Island ( $\chi^2_{1,5} = 1.8$ ,  $p = 0.179$ ; Fig 2).

## 279 **Gene cassette array diversity**

280 DNA sequencing identified five different gene cassette arrays from the 51 positive samples.  
281 The majority of the samples ( $n=40$ ) contained gene cassette arrays void of ARGs. Of the  
282 samples containing integrons with ARGs, seven contained a single gene cassette and the  
283 remaining four arrays each had two gene cassettes (Fig 3).

284 **Fig 3. Schematic map of class 1 integron gene cassette arrays identified in *N. cinerea***  
285 **and *A. p. doriferus* across all sampling sites and breeding seasons.** Number of individuals  
286 with each array are listed on the left-hand side. Gene cassettes are represented as broad  
287 arrows. Blue diamonds represent the primary integron recombination site, *attII*, where gene  
288 cassettes are inserted following acquisition; black circles represent gene cassette  
289 recombination site, *attC*. Gene symbols are as follows: *dhfrA* genes encode dihydrofolate  
290 reductases that confer resistance to trimethoprim; *aacA* genes encode aminoglycoside (6')  
291 acetyltransferases (*aacA*) that confer resistance to aminoglycoside antibiotics; *aadA* genes

292 encode aminoglycoside (3'') adenylyltransferases that confer resistance to streptomycin and  
293 spectinomycin; *arr3* genes encode ADP-ribosyl transferases that confer resistance to  
294 rifampin; *qac* genes encode efflux pumps that confer resistance to quaternary ammonium  
295 compounds; *qacEA* and IS26 represent the 3' terminus of some the gene cassette arrays  
296 depicted.

297 Class 1 integrons identified in samples from *A. p. doriferus* were the most diverse,  
298 encoding seven different ARGs, while only two types of ARGs were detected in *N. cinerea*  
299 (Fig 3). The most common cassette array was *dfrA7* ( $n=4$ ), identified in *E. coli* isolate DNA  
300 from both *N. cinerea* and *A. p. doriferus* pups.

301 The vast majority (49 of 51) of gene cassette arrays detected in this study contained  
302 the typical 3' conserved segment (*qacEA*), whereas, in the remaining two gene cassette  
303 arrays, *qacEA* was replaced with an IS26 transposase (Fig 3).

## 304 **Essential element and heavy metals and class 1 integron co-** 305 **selection**

306 There was no significant relationship between the concentrations of Zn ( $p=0.905$ ; 95% CI  
307 3.67-3.87), Se ( $p=0.507$ ; 3.00-3.56), As ( $p=0.446$ ; 0.05-0.07), Hg ( $p=0.335$ ; 0.05-0.12) or Pb  
308 ( $p=0.937$ ; 0.04-0.10) in whole blood and integron carriage in *A. p. doriferus* ( $n=52$ ) sampled  
309 at Seal Rocks in 2018.

## 310 **Discussion**

311 This study identified class 1 integrons in both *E. coli* and faecal DNA from free-  
312 ranging *N. cinerea* and *A. p. doriferus* pups at seven breeding colonies in Southern Australia,  
313 representing the first time ARGs have been detected in *A. p. doriferus*, and in the faecal  
314 microbiota from *N. cinerea* pups. The occurrence of class 1 integrons in *A. p. doriferus* pups

315 is of particular interest given the higher carriage of *intI1* in comparison with the other  
316 pinniped species studied.

317         There was similar class 1 integron abundance and gene cassette diversity across all  
318 four *A. p. doriferus* colonies sampled in 2017. These colonies differ in terms of size,  
319 topography, pup production and population density (44) and cover a wide geographical area.  
320 The similar *intI1* abundances indicates that these colonies are exposed to similar sources and  
321 levels of anthropogenic pollution, however, the number of *intI1* genes detected at Seal Rocks  
322 showed considerable change over sampling years (2017-2019), with a significant increase  
323 observed in 2018. This increase was not sustained over multiple breeding seasons and further  
324 investigation is needed to determine if this increase is due to a gradient of anthropogenic  
325 pollution or whether it is an aberrant finding at this colony. Seal Rocks was the only *A. p.*  
326 *doriferus* colony sampled over multiple breeding seasons limiting our ability to fully assess  
327 and compare trends in *intI1* abundance across other *A. p. doriferus* colonies over time.

328         The highest number of class 1 integrons was detected in *A. p. doriferus* pups at Seal  
329 Rocks. Class 1 integrons are generally more prevalent in locations closer to urbanised  
330 environments that are exposed to higher levels of anthropogenic pollution (13,45). Seal  
331 Rocks is located 1.8km from Phillip Island and approximately 7km from the Mornington  
332 Peninsula, both of which are densely populated over summer months when pups are born and  
333 sampled. Seal Rocks is also located within 150km of Melbourne, Australia's second largest  
334 city (~5 million people), which could result in continuous exposure of pinnipeds to a higher  
335 number of anthropogenic sources of pollution compared to *A. p. doriferus* pups at the other  
336 colonies sampled (for example, Deen Maar Island and Cape Bridgewater are ~250km and  
337 300km respectively from Melbourne), thereby facilitating the greater acquisition of class 1  
338 integrons.

339           The abundance of *intI1* is presumed to change rapidly based on environmental factors  
340 (13). Rapid changes in environments caused by extreme weather events can also introduce  
341 higher levels of runoff and industrial waste into the marine environment and distribute  
342 pollutants across wider geographical ranges (46). Environmental conditions at pinniped  
343 breeding colonies were not considered as part of this study, however, given the differences in  
344 *intI1* abundance observed, the influence of stochastic events on the presence of class 1  
345 integrons would need to be considered when attempting to understand the trends observed in  
346 *A. p. doriferus* pups.

347           In addition to the higher abundance of *intI1* genes detection in *A. p. doriferus* pups at  
348 Seal Rocks in 2018, was the presence of two IS26 class 1 integron variants in *E. coli* isolates.  
349 There are multiple reports of IS26 class 1 integron variants in *E. coli* from animals in  
350 Australia, including cows and pigs (14,47,48) and Grey-headed flying foxes (*Pteropus*  
351 *poliocephalus*) (49), as well as in human clinical cases (50). The presence of class 1 integrons  
352 with IS26 variants in *E. coli* isolates from free-ranging *A. p. doriferus* pups provides further  
353 evidence to suggest that this colony is exposed to a marine environment that is contaminated  
354 by various sources of anthropogenic pollution.

355           The finding of the *arr3* gene cassette in multiple *A. p. doriferus* pups at Seal Rocks in  
356 2018 was unexpected. This gene cassette, *arr3*, encodes ADP-ribosyl transferases which  
357 potentially confers resistance to rifampicin and has been identified in numerous Gram-  
358 negative pathogens (such as *Proteus spp.*) (51,52) and integrons in bacterial isolates from  
359 hospital patients (53). The *aacA4-arr3- qacEA* cassette array detected in *A. p. doriferus* is not  
360 widely reported in the literature (53), however, the closest matches on GenBank were  
361 predominately detected in *Proteus spp.* and *Klebsiella spp.* (e.g. CP053614, LC549808)  
362 isolates from hospital patients and zoo and production animals in China. In this study, the  
363 array was detected in faecal DNA and the bacterial carrier remains unknown. As the *arr3*



364 cassette is associated with human and domestic animal pathogens, the presence of this gene  
365 cassette in free-ranging pinnipeds provides further evidence to suggest that the Seal Rocks  
366 colony is exposed to anthropogenic microbial pollution.

367 In contrast to *A. p. doriferus* and *N. cinerea*, class 1 integrons were not detected in *A.*  
368 *forsteri* pups ( $n=150$ ) sampled over multiple breeding seasons. Over 5000 pups are born at  
369 the Cape Gantheaume colony each breeding season (54) and there is a much higher  
370 population density compared to Seal Slide, a small *N. cinerea* colony <10km away. Despite  
371 the similarity in location and higher population density between these two pinniped species a  
372 class 1 integron was detected in one of four *N. cinerea* sampled pups during the 2018  
373 breeding season. The difference in *intI1* abundance between species is likely multifactorial  
374 and further investigation is necessary to better understand the factors that contribute to the  
375 acquisition of class 1 integrons in free-ranging pinniped species.

376 Heavy metals are environmental pollutants that can act as co-selecting agents for  
377 antibiotic resistance (16). Heavy metals do not degrade and therefore persist in the  
378 environment for long periods of time, maintaining selective pressure for extended periods  
379 (18). Furthermore, the abundance of class 1 integrons has been found to correlate with heavy  
380 metal concentrations, with previous studies focusing on the relationship between heavy metal  
381 pollutants and *intI1* abundance in environmental samples including water and soil (17,55). It  
382 has been well established that concentrations of heavy metals are present in free-ranging  
383 marine mammals (27,28) and can bioaccumulate in upper trophic predators (26,56). Despite  
384 the association between heavy metal concentrations and class 1 integron abundance in  
385 environmental samples, this relationship has not previously been investigated in free-ranging  
386 wildlife. A significant relationship between the concentrations of ARB carriage and two  
387 essential elements and three heavy metals was not seen, although the small sample size for  
388 this specific comparison could have limited this analysis. In addition, the current comparison

389 was limited to concentrations of essential and heavy metals in whole blood which reflect  
390 recent exposure. The relationship between ARB carriage and heavy metal concentrations in  
391 other tissues (for example, liver) could be explored, given the bioaccumulation potential of  
392 this tissue when compared to whole blood (57).

393 Free-ranging wildlife are exposed to differing environmental conditions, selective  
394 pressures and exposure to ARB that likely drive the acquisition of ARGs (58). Pinniped pups  
395 sampled as part of this study were less than two months of age and confined to the breeding  
396 colonies. As such, the only potential source of exposure to bacteria and ARGs for pups are  
397 those present in the breeding colony environment, which could be contaminated by  
398 wastewater run-off, faecal contamination from other wildlife species (including sea birds)  
399 and juvenile and adult pinnipeds that inhabit these colonies (32,59). Evidence suggests that  
400 the prevalence of ARB in free-ranging wildlife is influenced by exposure to anthropogenic  
401 pollution and environmental contamination (58), with the latter varying depending on habitat  
402 occupation and behaviours exhibited by wildlife species (58). For example, foraging is a  
403 behaviour that can increase the likelihood of wildlife species being exposed to ARB (3). The  
404 pinniped species studied herein have differing foraging strategies. While *N. cinerea* and *A. p.*  
405 *doriferus* are benthic foragers (60–63), *A. forsteri* are pelagic foragers (64,65). In some  
406 aquatic species, differences in toxicant accumulation between benthic and pelagic feeders has  
407 been observed (57), thus differences in foraging behaviours could lead to exposure of higher  
408 levels of pollutants and increased ARB acquisition in benthic feeding pinniped species.  
409 Interactions with other species in ecosystems is another aspect to consider when attempting to  
410 understand the transfer of AMR. The presence of other species at pinniped breeding colonies  
411 such as sea birds, known carriers of numerous ARGs (59), could also influence the carriage  
412 of AMR in free-ranging pinnipeds. Sampling both environmental substrates and other

413 wildlife species present within study areas is required to gain a greater understanding of the  
414 source of AMR and the transfer of ARGs in free-ranging wildlife species.

## 415 **Conclusion**

416 This study detected bacteria carrying diverse gene cassettes encoding resistance to multiple  
417 classes of antibiotics in two species of free-ranging pinniped pups in Australia. The detection  
418 of class 1 integrons, mobile genetic elements that have been identified as useful indicators of  
419 antimicrobial pollution, suggests these populations are exposed to anthropogenic pollution.  
420 Furthermore, the detection of *E. coli* carrying IS26 class 1 integron variants in free-ranging  
421 pinniped pups indicates that these isolates originated from domestic animals and/or humans.  
422 Further investigation to better understand how antibiotic resistant bacteria are being acquired  
423 by free-ranging pinniped pups is critical and could be used as an additional mechanism to  
424 monitor anthropogenic pollution in marine ecosystems. Ongoing monitoring of antibiotic  
425 resistant bacteria in these species will also assist in understanding the role of increasing  
426 anthropogenic pollution on the long-term survival of these marine sentinel species.

## 427 **Acknowledgements**

428 We thank staff at Phillip Island Nature Parks (PINP), Victoria and staff at Seal Bay,  
429 Kangaroo Island, Department for Environment and Water (DEW), South Australia  
430 particularly Melanie Stonnill, for field assistance and logistical support; Simon Goldsworthy  
431 and South Australian Research and Development Institute (SARDI) for field assistance.  
432 Sample collection was made possible through the collaborative support of DEW, PINP and  
433 SARDI. We would like to thank Scott Lindsay, Shannon Taylor and Matthew Gray for  
434 assistance in sample collection; Victorian Fisheries Authorities, T-cat Charters, Seatec  
435 Marine services and Darren Guidera for marine charters. We thank Robert McQuilty, Royal  
436 Prince Alfred Hospital NSW, for his assistance in trace and heavy metal analysis.

437 **References**

- 438 1. Baquero F, Martínez J-L, Cantón R. Antibiotics and antibiotic resistance in water  
439 environments. *Curr Opin Biotechnol*. 2008;19(3):260–5.
- 440 2. Berendonk TU, Manaia CM, Merlin C, Fatta-Kassinos D, Cytryn E, Walsh F, et al.  
441 Tackling antibiotic resistance: the environmental framework. *Nat Rev Microbiol*.  
442 2015;13(5).
- 443 3. Vittecoq M, Godreuil S, Prugnotte F, Durand P, Brazier L, Renaud N, et al.  
444 Antimicrobial resistance in wildlife. *J Appl Ecol*. 2016 Apr 1;53(2):519–29.
- 445 4. Grilo ML, Sousa-Santos C, Robalo J, Oliveira M. The potential of *Aeromonas* spp.  
446 from wildlife as antimicrobial resistance indicators in aquatic environments. *Ecol*  
447 *Indic*. 2020;115.
- 448 5. Dunning Hotopp JC. Horizontal gene transfer between bacteria and animals. *Trends*  
449 *Genet*. 2011/02/18. 2011 Apr;27(4):157–63.
- 450 6. Thomas CM, Nielsen KM. Mechanisms of, and barriers to, horizontal gene transfer  
451 between bacteria. *Nat Rev Microbiol*. 2005;3(9):711.
- 452 7. Díaz-Mejía JJ, Amábile-Cuevas CF, Rosas I, Souza V. An analysis of the evolutionary  
453 relationships of integron integrases, with emphasis on the prevalence of class 1  
454 integrons in *Escherichia coli* isolates from clinical and environmental origins.  
455 *Microbiology*. 2008 Jan 1;154(1):94–102.
- 456 8. Domingues S, Silva GJ da, Nielsen KM. Integrons: Vehicles and pathways for  
457 horizontal dissemination in bacteria. *Mob Genet Elements*. 2012;2(5):211–23.
- 458 9. Gaze WH, Zhang L, Abdousslam NA, Hawkey PM, Calvo-Bado L, Royle J, et al.  
459 Impacts of anthropogenic activity on the ecology of class 1 integrons and integron-  
460 associated genes in the environment. *ISME J*. 2011;5(8):1253–61.
- 461 10. Gillings MR. Class 1 integrons as invasive species. *Curr Opin Microbiol*. 2017;38:10–

- 462 5.
- 463 11. Stokes HW, Gillings MR. Gene flow, mobile genetic elements and the recruitment of  
464 antibiotic resistance genes into Gram-negative pathogens. Vol. 35, FEMS  
465 Microbiology Reviews. Oxford, UK: Blackwell Publishing Ltd; 2011. p. 790–819.
- 466 12. Hall RM, Collis CM. Mobile gene cassettes and integrons: capture and spread of genes  
467 by site-specific recombination. Mol Microbiol. 1995 Feb 1;15(4):593–600.
- 468 13. Gillings MR, Gaze WH, Pruden A, Smalla K, Tiedje JM, Zhu Y-G. Using the class 1  
469 integron-integrase gene as a proxy for anthropogenic pollution. ISME J. 2014;9(6).
- 470 14. Dawes FE, Kuzevski A, Bettelheim KA, Hornitzky MA, Djordjevic SP, Walker MJ.  
471 Distribution of class 1 integrons with IS26-mediated deletions in their 3'-conserved  
472 segments in *Escherichia coli* of human and animal origin. PLoS One. 2010 Sep  
473 15;5(9):e12754–e12754.
- 474 15. Harmer CJ, Moran RA, Hall RM. Movement of IS26-associated antibiotic resistance  
475 genes occurs via a translocatable unit that includes a single IS26 and preferentially  
476 inserts adjacent to another IS26. Bush K, editor. MBio. 2014 Oct 31;5(5):e01801-14.
- 477 16. Nguyen CC, Hugie CN, Kile ML, Navab-Daneshmand T. Association between heavy  
478 metals and antibiotic-resistant human pathogens in environmental reservoirs: A  
479 review. Front Environ Sci Eng. 2019;13(3):46.
- 480 17. Wright MS, Baker-Austin C, Lindell AH, Stepanauskas R, Stokes HW, McArthur JV.  
481 Influence of industrial contamination on mobile genetic elements: class 1 integron  
482 abundance and gene cassette structure in aquatic bacterial communities. ISME J.  
483 2008;2(4):417.
- 484 18. Alonso A, Sánchez P, Martínez JL. Environmental selection of antibiotic resistance  
485 genes. Environ Microbiol. 2001 Feb 1;3(1):1–9.
- 486 19. Yazdankhah S, Skjerve E, Wasteson Y. Antimicrobial resistance due to the content of

- 487 potentially toxic metals in soil and fertilizing products. *Microb Ecol Health Dis.*  
488 2018;29(1):1548212–48.
- 489 20. Radhouani H, Silva N, Poeta P, Torres C, Correia S, Igrejas G. Potential impact of  
490 antimicrobial resistance in wildlife, environment, and human health. *Front Microbiol.*  
491 2014;5.
- 492 21. Goulas A, Livoreil B, Grall N, Benoit P, Couderc-Obert C, Dagot C, et al. What are  
493 the effective solutions to control the dissemination of antibiotic resistance in the  
494 environment? A systematic review protocol. *Environ Evid.* 2018;7(1):1–9.
- 495 22. Alonso CA, Alcalá L, Simón C, Torres C. Novel sequence types of extended-spectrum  
496 and acquired AmpC beta-lactamase producing *Escherichia coli* and *Escherichia coli*  
497 clade V isolated from wild mammals. *FEMS Microbiol Ecol.* 2017;93(8).
- 498 23. Ali H, Khan E, Ilahi I. Environmental chemistry and ecotoxicology of hazardous  
499 heavy metals: Environmental persistence, toxicity, and bioaccumulation. Yang Y,  
500 editor. *J Chem.* 2019;2019:6730305.
- 501 24. Daum JR, Shepherd DM, Noelle RJ. Immunotoxicology of cadmium and mercury on  
502 B-lymphocytes — I. Effects on lymphocyte function. *Int J Immunopharmacol.*  
503 1993;15(3):383–94.
- 504 25. Plum LM, Rink L, Haase H. The essential toxin: impact of zinc on human health. *Int J*  
505 *Environ Res Public Health.* 2010/03/26. 2010 Apr;7(4):1342–65.
- 506 26. Kretzmann M, Rohrbach L, Durham K, Digiovanni R, Sañudo-Wilhelmy S. Trace  
507 metal burdens in stranded seals from Long Island, New York: Potential evidence for  
508 species differences in foraging. *Aquat Mamm.* 2010;36(2):178–87.
- 509 27. Gray R, Canfield P, Rogers T. Trace element analysis in the serum and hair of  
510 Antarctic leopard seal, *Hydrurga leptonyx*, and Weddell seal, *Leptonychotes weddellii*.  
511 *Sci Total Environ.* 2008;399(1):202–15.

- 512 28. Ashley EA, Olson JK, Raverty S, Wilkinson K, Gaydos JK. Trace element  
513 concentrations in livers of Pacific harbor seals (*Phoca vitulina richardii*) from San  
514 Juan County, Washington, USA. *J Wildl Dis.* 2020 Mar 1;56(2):429–36.
- 515 29. Schaefer AM, Bossart GD, Mazzoil M, Fair PA, Reif JS. Risk factors for colonization  
516 of *E. coli* in Atlantic Bottlenose Dolphins (*Tursiops truncatus*) in the Indian River  
517 Lagoon, Florida. Schaefer AM, editor. *J Environ Public Health.*  
518 2011;2011(2011):597073.
- 519 30. Wallace C, Yund P, Ford T, Matassa K, Bass A. Increase in antimicrobial resistance in  
520 bacteria isolated from stranded marine mammals of the northwest Atlantic. *Ecohealth.*  
521 2013;10(2):201–10.
- 522 31. Bossart GD. Marine mammals as sentinel species for oceans and human health. *Vet*  
523 *Pathol.* 2010 Dec 15;48(3):676–90.
- 524 32. Dolejska M, Cizek A, Literak I. High prevalence of antimicrobial-resistant genes and  
525 integrons in *Escherichia coli* isolates from Black-headed Gulls in the Czech Republic.  
526 *J Appl Microbiol.* 2007 Jul 1;103(1):11–9.
- 527 33. Lundbäck IC, McDougall FK, Dann P, Slip DJ, Gray R, Power ML. Into the sea:  
528 Antimicrobial resistance determinants in the microbiota of little penguins (*Eudyptula*  
529 *minor*). *Infect Genet Evol.* 2020;104697.
- 530 34. McDougall F, Boardman W, Gillings M, Power M. Bats as reservoirs of antibiotic  
531 resistance determinants: A survey of class 1 integrons in Grey-headed Flying Foxes  
532 (*Pteropus poliocephalus*). *Infect Genet Evol.* 2019;70:107–13.
- 533 35. Fulham M, Power M, Gray R. Comparative ecology of *Escherichia coli* in endangered  
534 Australian sea lion (*Neophoca cinerea*) pups. *Infect Genet Evol.* 2018;62:262–9.
- 535 36. Delport TC, Harcourt RG, Beaumont LJ, Webster KN, Power ML. Molecular  
536 detection of antibiotic-resistance determinants in *Escherichia coli* isolated from the

- 537 endangered Australian sea lion (*Neophoca cinerea*). *J Wildl Dis.* 2015;51(3):555–63.
- 538 37. Power ML, Samuel A, Smith JJ, Stark JS, Gillings MR, Gordon DM. *Escherichia coli*  
539 out in the cold: Dissemination of human-derived bacteria into the Antarctic  
540 microbiome. *Environ Pollut.* 2016;215:58–65.
- 541 38. Kirkwood R, Goldsworthy S. *Fur Seals and Sea Lions*. Collingwood, VIC: CSIRO  
542 PUBLISHING; 2013. (Australian Natural History Series).
- 543 39. Fulham M, Power M, Gray R. Diversity and distribution of *Escherichia coli* in three  
544 species of free-ranging Australian pinniped pups. Vol. 7, *Frontiers in Marine Science*.  
545 2020. p. 755.
- 546 40. Waldron LS, Gillings MR. Screening foodstuffs for class 1 integrons and gene  
547 cassettes. Waldron LS, editor. *J Vis Exp.* 2015;2015(100):e52889–e52889.
- 548 41. Lane D. Nucleic acid techniques in bacterial systematics. In: Stackebrandt E, editor.  
549 *Nucleic Acid Techniques in Bacterial Systematics*. Hoboken, N.J.: John Wiley and  
550 Sons; 1991.
- 551 42. Holmes AJ, Gillings MR, Nield BS, Mabbutt BC, Nevalainen KMH, Stokes HW. The  
552 gene cassette metagenome is a basic resource for bacterial genome evolution. *Environ*  
553 *Microbiol [Internet]*. 2003 May 1;5(5):383–94. Available from:  
554 <http://dx.doi.org/10.1046/j.1462-2920.2003.00429.x>
- 555 43. Escudero J, Loot C, Nivina A, Mazel D. The integron: adaptation on demand. In:  
556 Sandmeyer S, editor. *Mobile DNA III*. Washinton, DC: ASM Press; 2015. p. 139–61.
- 557 44. McIntosh RR, Kirkman SP, Thalmann S, Sutherland DR, Mitchell A, Arnould JPY, et  
558 al. Understanding meta-population trends of the Australian fur seal, with insights for  
559 adaptive monitoring. *PLoS One.* 2018;13(9):e0200253.
- 560 45. Koczura R, Mokracka J, Taraszewska A, Łopacinska N. Abundance of class 1  
561 integron-integrase and sulfonamide resistance genes in river water and sediment is



- 562 affected by anthropogenic pressure and environmental factors. *Microb Ecol.*  
563 2016;72(4):909–16.
- 564 46. Yin J, Gentine P, Zhou S, Sullivan SC, Wang R, Zhang Y, et al. Large increase in  
565 global storm runoff extremes driven by climate and anthropogenic changes. *Nat*  
566 *Commun.* 2018;9(1):4310–89.
- 567 47. Reid C, Wyrsh E, Zingali T, Liu M, Darling A, Chapman T, et al. Porcine commensal  
568 *Escherichia coli*: A reservoir for class 1 integrons associated with IS26. *BioRxiv.* 2017;
- 569 48. Zingali T, Reid C, Chapman T, Gaio D, Liu M, Darling A, et al. Whole genome  
570 sequencing analysis of porcine faecal commensal *Escherichia coli* carrying class 1  
571 integrons from sows and their offspring. *Microorganisms.* 2020 Jun 4;8:843.
- 572 49. McDougall FK, Boardman WSJ, Power ML. Characterization of beta-lactam-resistant  
573 *Escherichia coli* from Australian fruit bats indicates anthropogenic origins. *Microb*  
574 *Genomics.* 2021 May 5;7(5):000571.
- 575 50. Hastak P, Cummins ML, Gottlieb T, Cheong E, Merlino J, Myers GSA, et al. Genomic  
576 profiling of *Escherichia coli* isolates from bacteraemia patients: a 3-year cohort study  
577 of isolates collected at a Sydney teaching hospital. *Microb Genomics.* 2020 May  
578 1;6(5):e000371.
- 579 51. Baysarowich J, Koteva K, Hughes DW, Ejim L, Griffiths E, Zhang K, et al. Rifamycin  
580 antibiotic resistance by ADP-ribosylation: Structure and diversity of Arr. *Proc Natl*  
581 *Acad Sci U S A.* 2008/03/18. 2008 Mar 25;105(12):4886–91.
- 582 52. Bie L, Fang M, Li Z, Wang M, Xu H. Identification and characterization of new  
583 resistance-conferring SGI1s (Salmonella Genomic Island 1) in *Proteus mirabilis*. Vol.  
584 9, *Frontiers in Microbiology.* 2018. p. 3172.
- 585 53. Xia W, Xu T, Qin T, Li P, Liu Y, Kang H, et al. Characterization of integrons and  
586 novel cassette arrays in bacteria from clinical isolates in China, 2000-2014. *J Biomed*

- 587 Res. 2016/05/10. 2016 Jul;30(4):292–303.
- 588 54. Shaughnessy PD, Goldsworthy SD. Increasing abundance of pups of the long-nosed  
589 fur seal (*Arctocephalus forsteri*) on Kangaroo Island, South Australia, over 26  
590 breeding seasons to 2013–14. Wildl Res. 2015 Dec 1;42(8):619–32.
- 591 55. Dickinson AW, Power A, Hansen MG, Brandt KK, Piliposian G, Appleby P, et al.  
592 Heavy metal pollution and co-selection for antibiotic resistance: A microbial  
593 palaeontology approach. Environ Int. 2019;132:105117.
- 594 56. Wintle NJP, Duffield DA, Barros NB, Jones RD, Rice JM. Total mercury in stranded  
595 marine mammals from the Oregon and southern Washington coasts. Mar Mammal Sci.  
596 2011;27(4):E268–78.
- 597 57. Bustamante P, Bocher P, Chérel Y, Miramand P, Caurant F. Distribution of trace  
598 elements in the tissues of benthic and pelagic fish from the Kerguelen Islands. Sci  
599 Total Environ. 2003 Sep 1;313(1–3):25–39.
- 600 58. Ramey AM, Ahlstrom CA. Antibiotic resistant bacteria in wildlife: perspectives on  
601 trends, acquisition and dissemination, data gaps, and future directions. J Wildl Dis.  
602 2020 Jan 1;56(1):1–15.
- 603 59. Dolejska M, Literak I. Wildlife is overlooked in the epidemiology of medically  
604 important antibiotic-resistant bacteria. Antimicrob Agents Chemother.  
605 2019;8(63):e01167-19.
- 606 60. Arnould JPY, Kirkwood R. Habitat selection by female Australian fur seals  
607 (*Arctocephalus pusillus doriferus*). Aquat Conserv Mar Freshw Ecosyst. 2007 Dec  
608 1;17(S1):S53–67.
- 609 61. Arnould JPY, Hindell MA. Dive behaviour, foraging locations, and maternal-  
610 attendance patterns of Australian fur seals (*Arctocephalus pusillus doriferus*). Can J  
611 Zool. 2001;79(1):35–48.

- 612 62. Peters KJ, Ophelkeller K, Bott NJ, Deagle BE, Jarman SN, Goldsworthy SD. Fine-  
613 scale diet of the Australian sea lion (*Neophoca cinerea*) using DNA-based analysis of  
614 faeces. *Mar Ecol*. 2015 Sep 1;36(3):347–67.
- 615 63. Fowler SL, Costa DP, Arnould JPY. Ontogeny of movements and foraging ranges in  
616 the Australian sea lion. *Mar Mammal Sci*. 2007 Jul 1;23(3):598–614.
- 617 64. Baylis AMM, Page B, Goldsworthy SD. Effect of seasonal changes in upwelling  
618 activity on the foraging locations of a wide-ranging central-place forager, the New  
619 Zealand fur seal. *Can J Zool*. 2008;86(8):774–89.
- 620 65. Page B, McKenzie J, Sumner MD, Coyne M, Goldsworthy SD. Spatial separation of  
621 foraging habitats among New Zealand fur seals. *Mar Ecol Prog Ser*. 2006;323:263–79.  
622

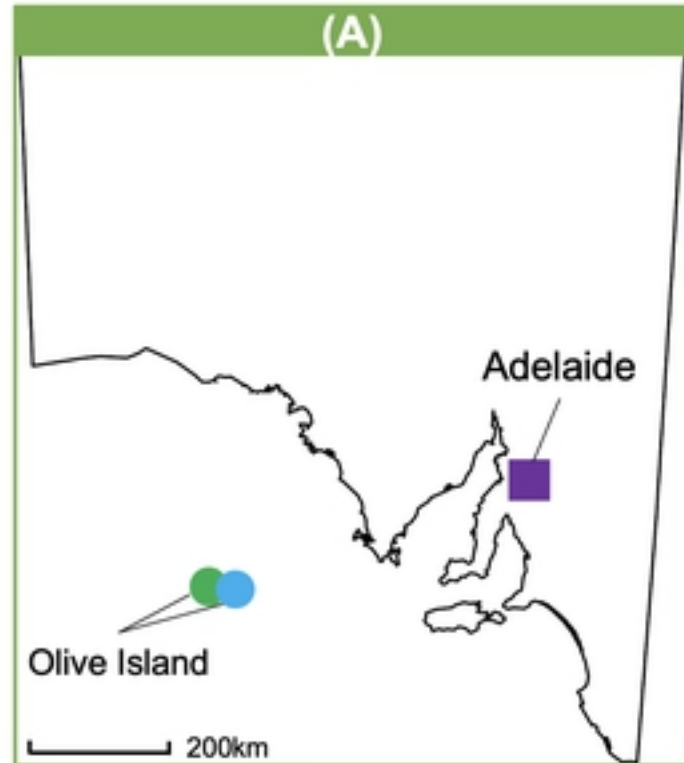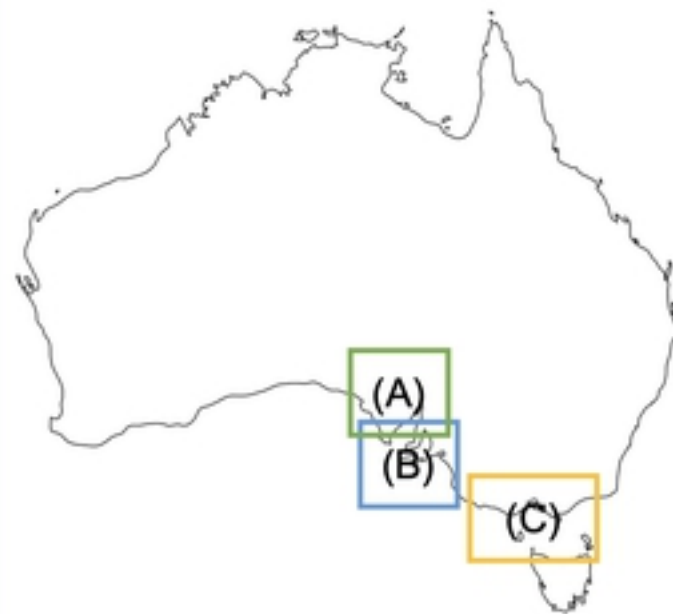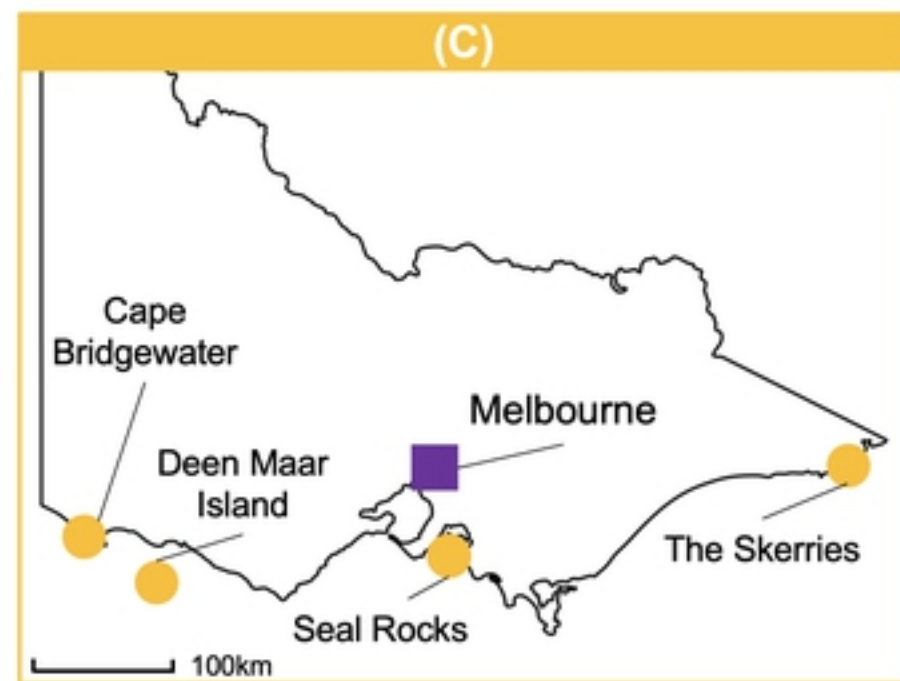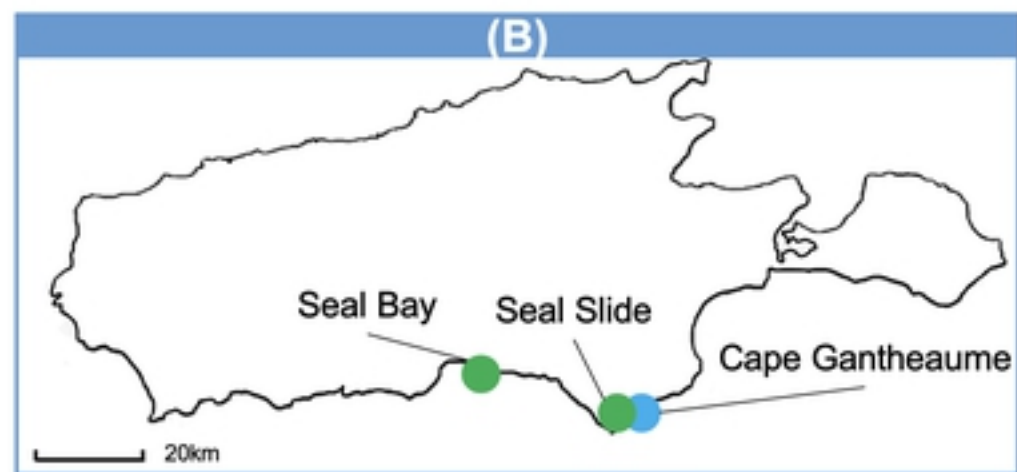

- Australian sea lion
- Australian fur seal
- Long-nosed fur seal
- Capital city

Fig 1

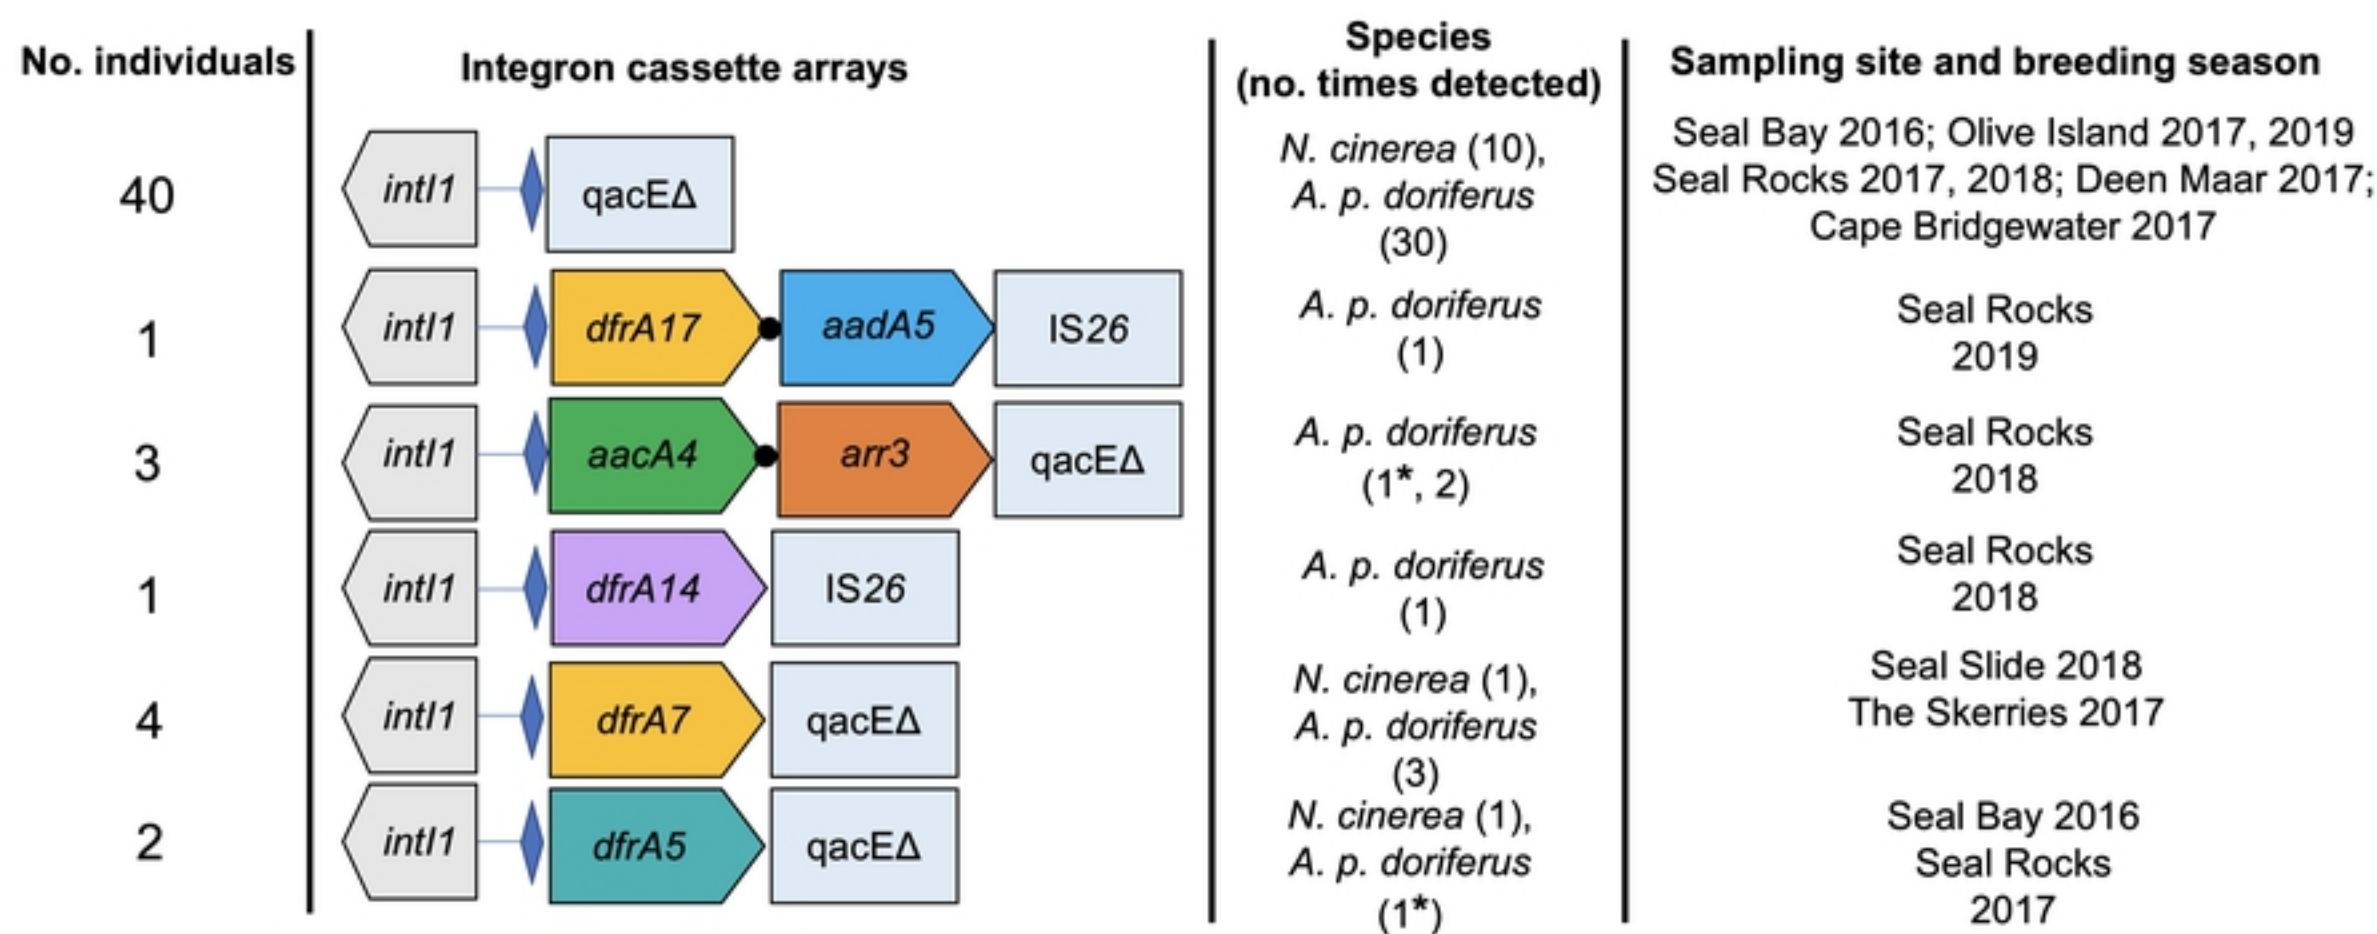

\*Detected in faecal DNA

Fig 3

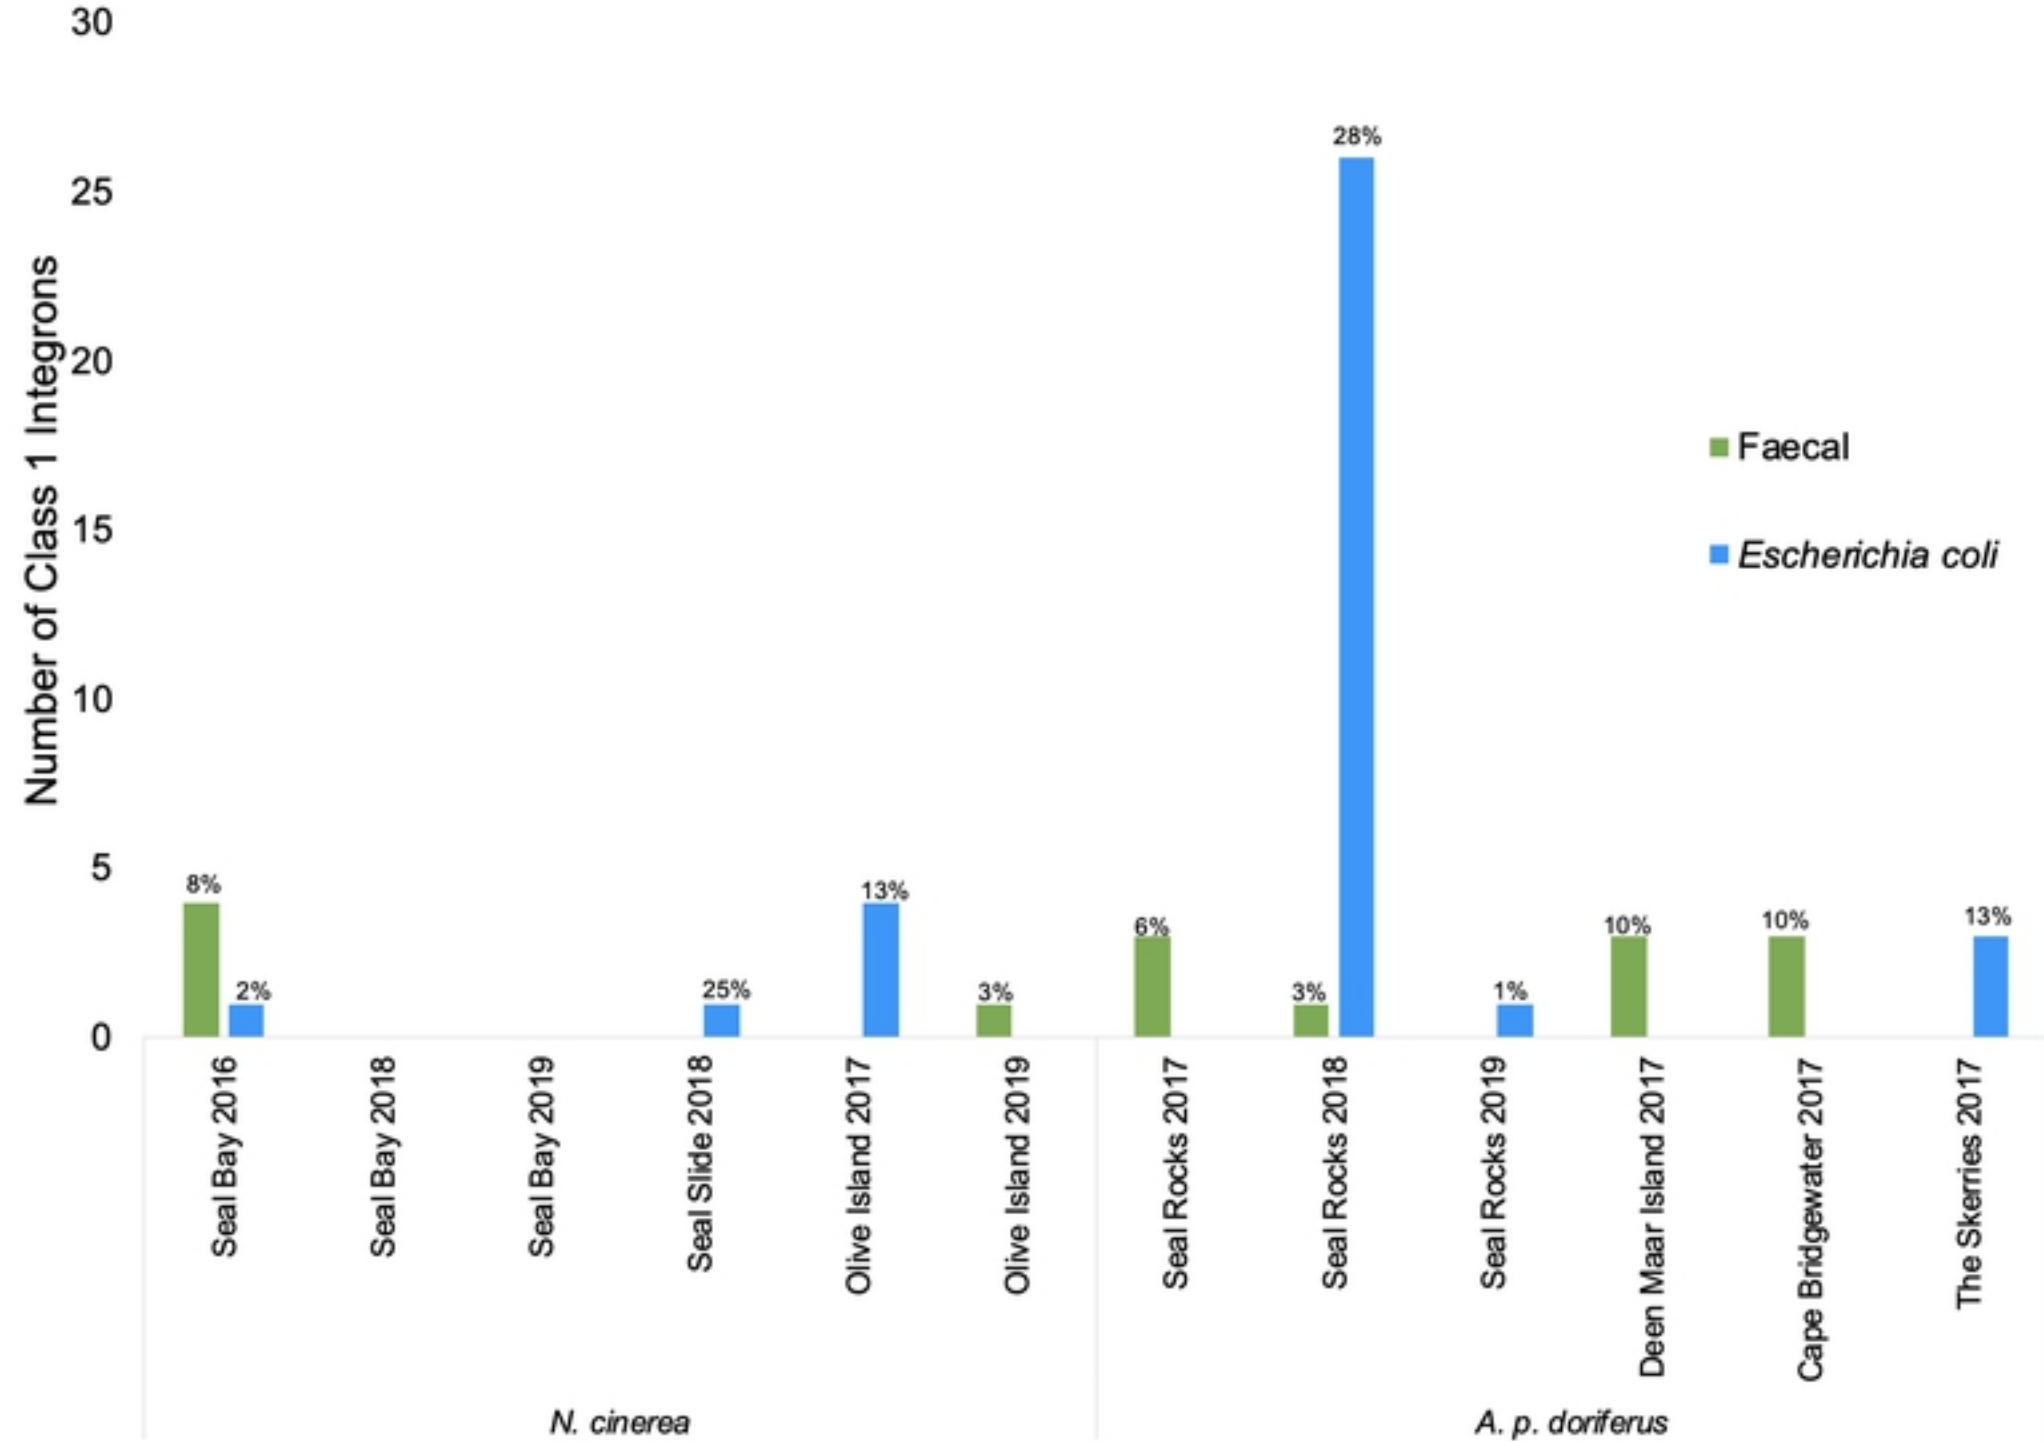

Fig 2
